# Supplementary material for: Electrochemical activation of carbon cloth in aqueous inorganic salt solution for superior capacitive performance
Source: Royal Society of Chemistry journal article supplement (doi:10.1039/c6nr00606j), 2016-01-01
Supplement: c6nr00606j1.pdf [file c6nr00606j1.pdf]

## Supporting Information

### Electrochemical activation of Carbon Cloth in Aqueous Inorganic Salts

#### Solution for superior capacitive performance

Dong Ye<sup>1</sup>, Yao Yu<sup>1\*</sup>, Jie Tang<sup>2</sup>, Lin Liu<sup>1</sup> and Yue Wu<sup>3</sup>

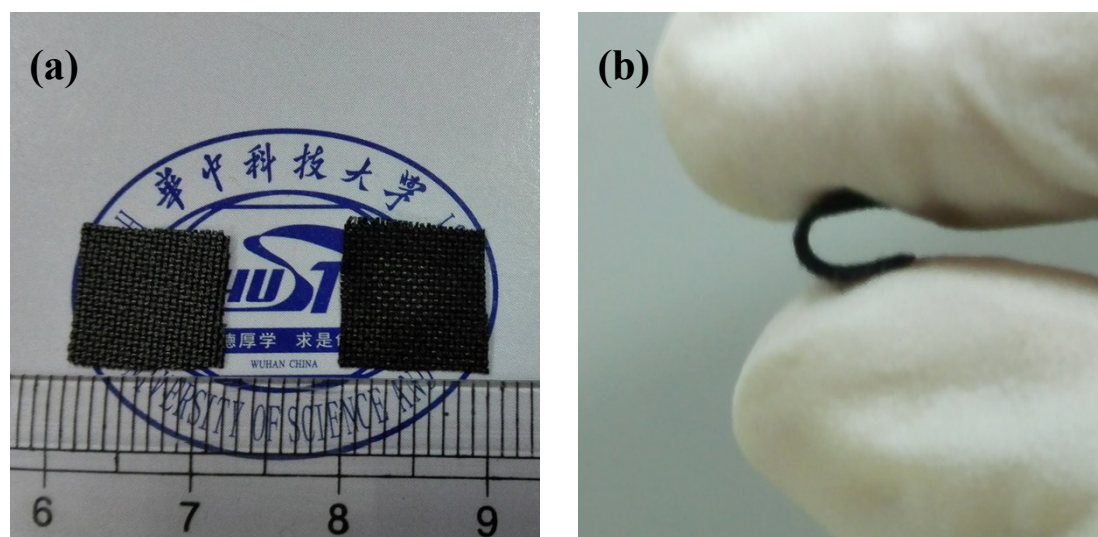

**Figure S1.** (a) Digital photo of the pristine CC (left) and the ECC-15 sample (right); (b) Digital photo for illustrating the good flexibility of the ECC-15 sample.

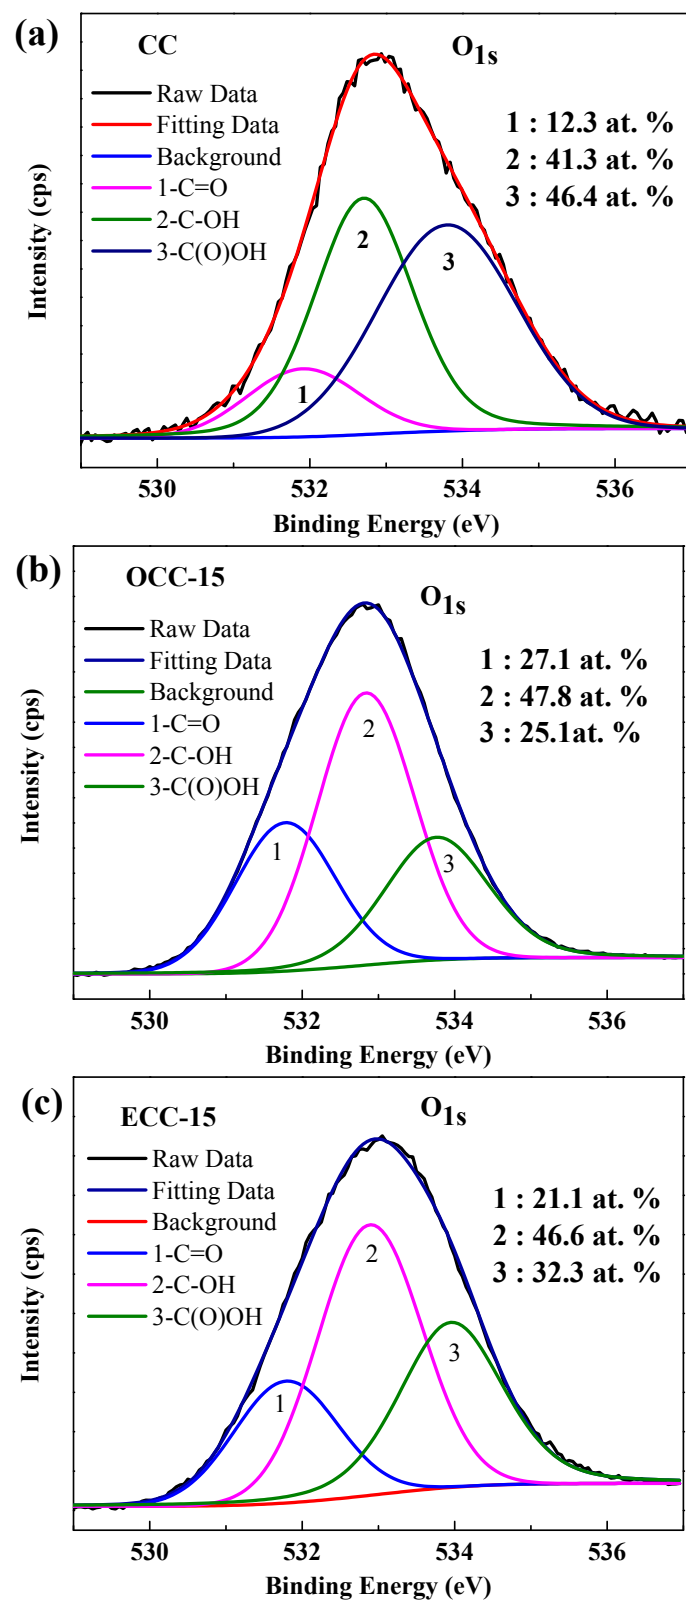

**Figure S2.** The high-resolution O<sub>1s</sub> XPS spectra of the CC (a), OCC-15 (b), and ECC-15 sample (c).

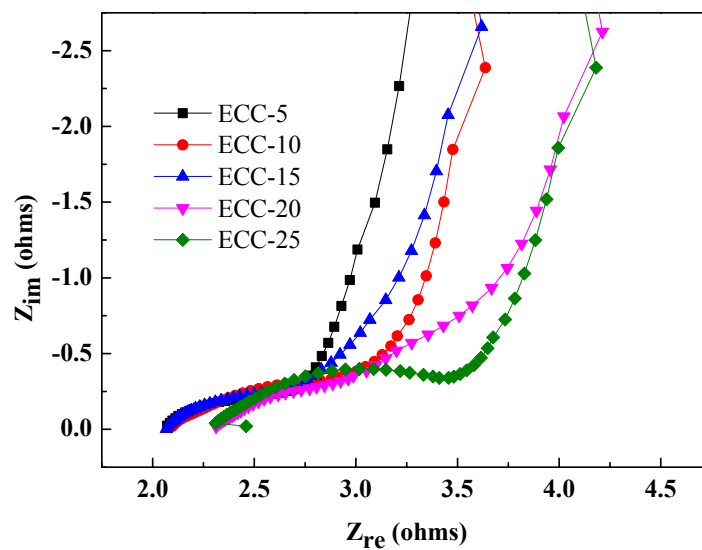

**Figure S3.** Nyquist plot from the ECC-X samples with different activation time.

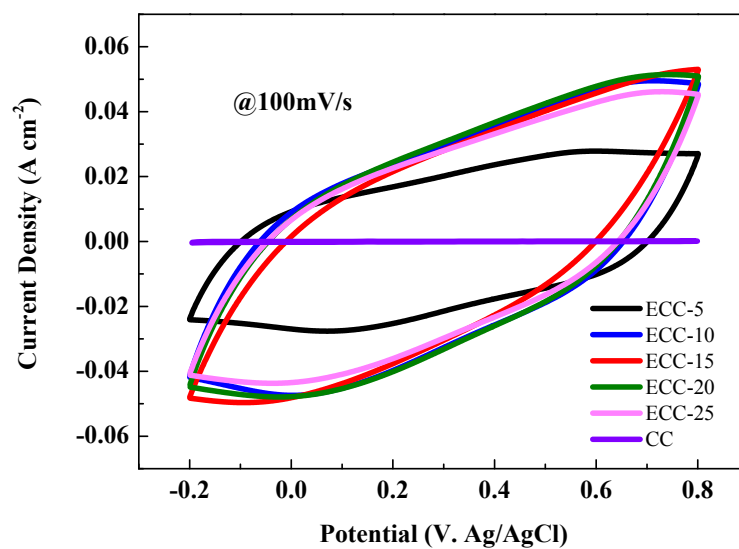

**Figure S4.** CV curves of the activated CC electrodes collected at a scan rate of  $100\ mV\ s^{-1}$  as a function of exfoliation time

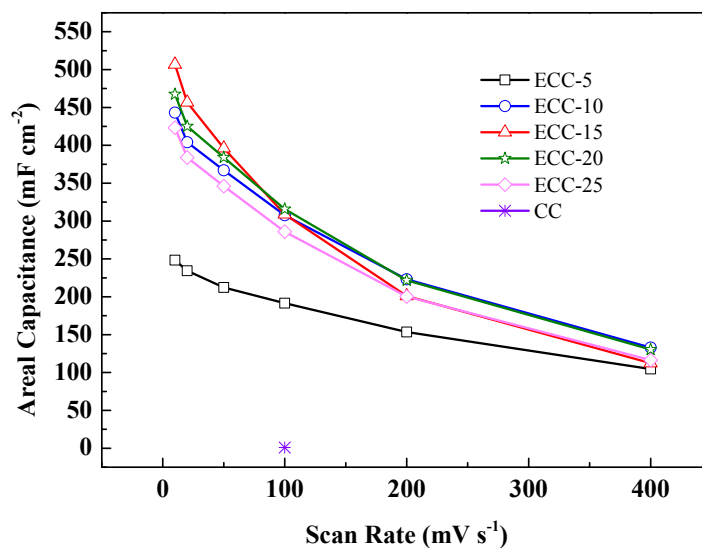

**Figure S5.** Areal capacitance calculated from CV curve at a scan rate from 10 to 400 mV s<sup>-1</sup> for all activated CC electrodes.

**Table S1** Given that the carbon fiber cloth is a 3D structure, the areal and volumetric specific capacitances of the pristine CC, OCC-15 and ECC-15 samples. (The volumetric specific capacitance ( $C_V$ ) is equal to the areal specific capacitance ( $C_S$ ) over the thickness ( $d$ ) of the carbon fiber cloth.)

|               | Areal Capacitance (mF cm <sup>-2</sup> ) |                                    | Volumetric Capacitance (mF cm <sup>-3</sup> ) |                                    |
|---------------|------------------------------------------|------------------------------------|-----------------------------------------------|------------------------------------|
|               | From GCD<br>@ 6 mA cm <sup>-2</sup>      | From CV<br>@ 20 mV s <sup>-1</sup> | From GCD<br>@ 6 mA cm <sup>-2</sup>           | From CV<br>@ 20 mV s <sup>-1</sup> |
| <b>CC</b>     | 0.8                                      | 0.9                                | 25                                            | 28.1                               |
| <b>OCC-15</b> | 18.7                                     | 48.8                               | 584.4                                         | 1525                               |
| <b>ECC-15</b> | 505.5                                    | 456.7                              | 15796.9                                       | 14271.9                            |
